# Supplementary material
Source: PubMed Central journal article supplement (PMC2373331)
Supplement: 0802067105_Supplemental_PDF.pdf [file 0802067105_Supplemental_PDF.pdf]

# Supporting Information

Sim and Denlinger 10.1073/pnas.0802067105

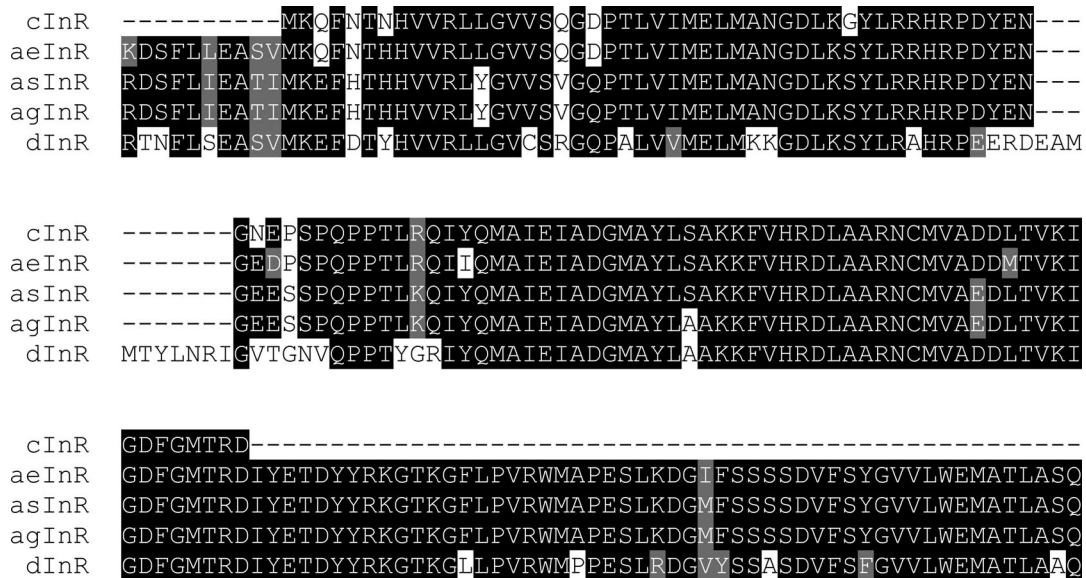

**Fig. S1.** Multiple sequence alignment of the deduced *C. pipiens* insulin receptor (InR) with other insect InRs retrieved from the GenBank database. Amino acids identical to *C. pipiens* are black, and conserved and semiconserved substitutions are in gray. cInR, *C. pipiens*, EU442282; aeInR, *A. aegypti*, EAT46545; asInR, *Anopheles stephensi*, AAU06124; agInR, *A. gambiae*, XP\_320130; dInR, *D. melanogaster*, AAC47458.

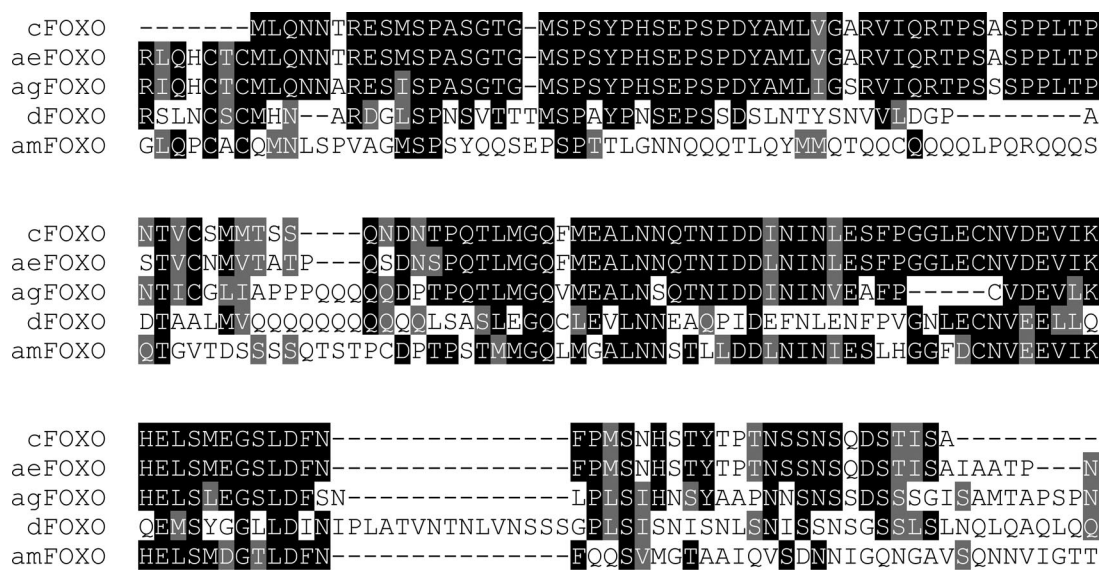

**Fig. S2.** Multiple sequence alignment of the deduced *C. pipiens* forkhead transcription factor with other insect FOXOs retrieved from the GenBank database. Amino acids identical to *C. pipiens* are black, and conserved and semiconserved substitutions are in gray. cFOXO, *C. pipiens*, EU442283; aeFOXO, *A. aegypti*, EAT34955; agFOXO, *A. gambiae*, XP.321536; dFOXO, *D. melanogaster*, NP.996204; amFOXO, *A. mellifera*, XP.001122804.
